# Supplementary material for: Disentangling the Complexity of HGF Signaling by Combining Qualitative and Quantitative Modeling
Source: PubMed Central journal article supplement (PMC4427303; doi:10.1371/journal.pcbi.1004192), 2015-04-23
Supplement: pcbi.1004192.s020.pdf [file pcbi.1004192.s020.pdf]

Here, we specify the pseudocodes for the selection of minimal model structures from the interaction graph master model. The user calls the function “SelectModels” (pseudocode this page), returning the building blocks of the selected minimal model structures. During the computation, two subroutines are called: “CNAComputeDepMat”, a *CellNetAnalyzer* API function [39] that computes the dependency matrix of a given model structure, and “DepMatCompare” (pseudocode next page), which compares the model predictions derived from the dependency matrix with the discretized experimental data.

### Pseudocode of function SelectModels

```

Function BuildingBlocks ← SelectModels (DataEarly,DataLate,Inhibitors,CoreModel,CandEdges)


---


inputs:
  DataEarly: for each measured protein, discretized fold change of different pairwise comparisons of experiments,
  early response
  DataLate: for each measured protein, discretized fold change of different pairwise comparisons of experiments,
  late response
  Inhibitors: for each pairwise comparison of experiments, applied inhibitor(s) making up the difference of the two
  experiments
  CoreModel: Interaction graph core model in CellNetAnalyzer format
  CandEdges: candidate edges
output:
  BuildingBlocks: building blocks of selected minimal model structures

/* compute dependency matrix of core model                                     */
DepMat ← CNAComputeDepMat (CoreModel);
call DepMatCompare (DataEarly,DataLate,Inhibitors,DepMat) returning Mismatch;
if Mismatch = 0 then
  | print 'Core model in accordance with data';
  | return;
end
BuildingBlocks ← empty set;
for i from 1 to number of CandEdges do
  | [Combi_1 , ..., Combi_K ] ← all i-combinations of CandEdges;
  | for j from 1 to K do
  | | if Combi_j is not superset of an element of BuildingBlocks then
  | | | /* compute dependency matrix of core model plus edges from Combi_j */
  | | | Model ← CoreModel plus edges from Combi_j;
  | | | DepMat ← CNAComputeDepMat (Model);
  | | | call DepMatCompare (DataEarly,DataLate,Inhibitors,DepMat) returning Mismatch;
  | | | if Mismatch = 0 then
  | | | | append Combi_j to BuildingBlocks;
  | | | end
  | | end
  | end
end

```

## Pseudocode of function DepMatCompare

**Function** Mismatch  $\leftarrow$  DepMatCompare (*DataEarly, DataLate, Inhibitors, DepMat*)

**inputs:**

DataEarly: for each measured protein, discretized fold change of different pairwise comparisons of experiments, early response

DataLate: for each measured protein, discretized fold change of different pairwise comparisons of experiments, late response

Inhibitors: for each pairwise comparison of experiments, applied inhibitor(s) making up the difference of the two experiments

DepMat: dependency matrix

**output:**

Mismatch: number of mismatches between model predictions and discretized data

**for** *i* from 1 to number of measured species **do**

**for** *j* from 1 to number of pairwise comparisons of experiments **do**

**if** all Inhibitors of *j*th comparison are weak/strong activators for species *i* **then** /\* this information is taken from DepMat \*/

      | ModelPredictionsEarly(*i, j*)  $\leftarrow$  decrease;

**else if** all Inhibitors of *j*th comparison are weak/strong inhibitors for species *i* **then**

      | ModelPredictionsEarly(*i, j*)  $\leftarrow$  increase;

**else if** all Inhibitors of *j*th comparison are neutral factors for species *i* **then**

      | ModelPredictionsEarly(*i, j*)  $\leftarrow$  no change;

**else**

      | ModelPredictionsEarly(*i, j*)  $\leftarrow$  increase, decrease, or no change;

**end**

**if** all Inhibitors of *j*th comparison are strong activators for species *i* **then**

      | ModelPredictionsLate(*i, j*)  $\leftarrow$  decrease;

**else if** all Inhibitors of *j*th comparison are strong inhibitors for species *i* **then**

      | ModelPredictionsLate(*i, j*)  $\leftarrow$  increase;

**else if** all Inhibitors of *j*th comparison are neutral factors for species *i* **then**

      | ModelPredictionsLate(*i, j*)  $\leftarrow$  no change;

**else**

      | ModelPredictionsLate(*i, j*)  $\leftarrow$  increase, decrease, or no change;

**end**

**end**

**end**

Mismatch  $\leftarrow$  count mismatches between DataEarly and ModelPredictionsEarly and DataLate and ModelPredictionsLate;
