# Supplementary material for: Disentangling the Complexity of HGF Signaling by Combining Qualitative and Quantitative Modeling
Source: PLoS Comput Biol. 2015 Apr 23;11(4):e1004192. doi: 10.1371/journal.pcbi.1004192 (PMC4427303; doi:10.1371/journal.pcbi.1004192)
Supplement: S2 Dataset — The datasets contain the experimental data used for the selection of minimal model structures and model calibration. The datafile is characterized by a header row as follow: Time: duration of HGF stimulation. Units: minutes. Gel: unique number to identify the gel for each analyzed protein. In this special case, “gel” refers to protein array. HGF_input: concentration of HGF used for stimulation. Units: ng/ml Met_ihn: Met inhibitor Mek_inh: MEK inhibitor Pdk_inh: PDK1 inhibitor ERK siRNA: siRNA targeting ERK1/2 Rasnew_au: active Ras measured by protein array. Units: arbitrary units (au) NaN: no datapoint has been measured for the indicated condition. Columns defining perturbation treatment (inhibitor or siRNA): 0 indicates that the corresponding inhibitor or siRNA was not present; 1 indicates that the corresponding inhibitor or siRNA was present. (XLSX) [file pcbi.1004192.s023.xlsx]

## Sheet: Sheet1
time	Gel	HGF_input	Met_inh	Mek_inh	Pdk_inh	ERK_siRNA	aRas_au	Exp_Gel_ori	Gel_ori	Exp
0	123	40	0	0	0	0	32	Ras_a_1	1	Ras_a
0.8	123	40	0	0	0	0	33	Ras_a_1	1	Ras_a
2	123	40	0	0	0	0	55	Ras_a_1	1	Ras_a
5	123	40	0	0	0	0	64	Ras_a_1	1	Ras_a
8	123	40	0	0	0	0	74	Ras_a_1	1	Ras_a
10	123	40	0	0	0	0	60	Ras_a_1	1	Ras_a
12	123	40	0	0	0	0	76	Ras_a_1	1	Ras_a
15	123	40	0	0	0	0	67	Ras_a_1	1	Ras_a
20	123	40	0	0	0	0	64	Ras_a_1	1	Ras_a
30	123	40	0	0	0	0	56	Ras_a_1	1	Ras_a
45	123	40	0	0	0	0	57	Ras_a_1	1	Ras_a
60	123	40	0	0	0	0	59	Ras_a_1	1	Ras_a
90	123	40	0	0	0	0	58	Ras_a_1	1	Ras_a
120	123	40	0	0	0	0	39	Ras_a_1	1	Ras_a
0	124	40	0	0	0	0	62.53	Ras_b_2	2	Ras_b
0	124	40	0	0	0	0	59.98	Ras_b_2	2	Ras_b
1	124	40	0	0	0	0	62.69	Ras_b_2	2	Ras_b
2	124	40	0	0	0	0	60.32	Ras_b_2	2	Ras_b
4	124	40	0	0	0	0	54.32	Ras_b_2	2	Ras_b
6	124	40	0	0	0	0	62.13	Ras_b_2	2	Ras_b
8	124	40	0	0	0	0	95.26	Ras_b_2	2	Ras_b
10	124	40	0	0	0	0	134.89	Ras_b_2	2	Ras_b
12	124	40	0	0	0	0	95.81	Ras_b_2	2	Ras_b
15	124	40	0	0	0	0	90.71	Ras_b_2	2	Ras_b
18	124	40	0	0	0	0	67.11	Ras_b_2	2	Ras_b
20	124	40	0	0	0	0	87.21	Ras_b_2	2	Ras_b
25	124	40	0	0	0	0	60.81	Ras_b_2	2	Ras_b
30	124	40	0	0	0	0	67.31	Ras_b_2	2	Ras_b
45	124	40	0	0	0	0	74.10	Ras_b_2	2	Ras_b
60	124	40	0	0	0	0	56.92	Ras_b_2	2	Ras_b
0	125	40	0	0	0	0	321	Ras_c_3	3	Ras_c
2	125	40	0	0	0	0	549	Ras_c_3	3	Ras_c
5	125	40	0	0	0	0	640	Ras_c_3	3	Ras_c
8	125	40	0	0	0	0	737	Ras_c_3	3	Ras_c
10	125	40	0	0	0	0	599	Ras_c_3	3	Ras_c
12	125	40	0	0	0	0	758	Ras_c_3	3	Ras_c
15	125	40	0	0	0	0	667	Ras_c_3	3	Ras_c
20	125	40	0	0	0	0	643	Ras_c_3	3	Ras_c
30	125	40	0	0	0	0	561	Ras_c_3	3	Ras_c
45	125	40	0	0	0	0	573	Ras_c_3	3	Ras_c
60	125	40	0	0	0	0	592	Ras_c_3	3	Ras_c
90	125	40	0	0	0	0	579	Ras_c_3	3	Ras_c
120	125	40	0	0	0	0	387	Ras_c_3	3	Ras_c
0	125	40	0	0	0	0	327	Ras_c_3	3	Ras_c
