# Supplementary material for: Disentangling the Complexity of HGF Signaling by Combining Qualitative and Quantitative Modeling
Source: PLoS Comput Biol. 2015 Apr 23;11(4):e1004192. doi: 10.1371/journal.pcbi.1004192 (PMC4427303; doi:10.1371/journal.pcbi.1004192)
Supplement: S3 Dataset — The datasets contain the experimental data used for the selection of minimal model structures and model calibration. The datafile is characterized by a header row as follow: Time: duration of HGF stimulation. Units: minutes. Gel: unique number to identify the gel for each analyzed protein HGF_input: concentration of HGF used for stimulation. Units: ng/ml Met_ihn: Met inhibitor Mek_inh: MEK inhibitor Pdk_inh: PDK1 inhibitor ERK siRNA: siRNA targeting ERK1/2 aRas_au: active Ras measured by immunoblot. Units: arbitrary units (au) Exp_Gel_ori: experiment identifier is indicated in letters (i.e. “A_tc”); reference number of gel. Gel_ori: internal reference gel number Exp: internal reference experiment identifier. (XLSX) [file pcbi.1004192.s024.xlsx]

## Sheet: Sheet1
time	Gel	HGF_input	Met_inh	Mek_inh	Pdk_inh	ERK_siRNA	Rasnew_au
0	601	40	0	0	0	0	177000
2	601	40	0	0	0	0	208000
5	601	40	0	0	0	0	400000
10	601	40	0	0	0	0	357000
20	601	40	0	0	0	0	330000
30	601	40	0	0	0	0	248000
60	601	40	0	0	0	0	359000
0	602	40	0	0	0	0	532000
5	602	40	0	0	0	0	392000
10	602	40	0	0	0	0	443000
20	602	40	0	0	0	0	411000
30	602	40	0	0	0	0	167000
60	602	40	0	0	0	0	731000
0	602	40	0	0	0	0	212000
5	602	40	0	0	0	0	417000
10	602	40	0	0	0	0	508000
20	602	40	0	0	0	0	416000
30	602	40	0	0	0	0	541000
60	602	40	0	0	0	0	534000
2	603	40	0	0	0	0	711000
10	603	40	0	0	0	0	717000
30	603	40	0	0	0	0	534000
60	603	40	0	0	0	0	1210000
0	604	40	0	0	0	0	469000
5	604	40	0	0	0	0	403000
20	604	40	0	0	0	0	463000
40	604	40	0	0	0	0	758000
120	604	40	0	0	0	0	534000
